# Supplementary material for: Human genetic variation in GLS2 is associated with development of complicated Staphylococcus aureus bacteremia
Source: PLoS Genet. 2018 Oct 5;14(10):e1007667. doi: 10.1371/journal.pgen.1007667 (PMC6192642; doi:10.1371/journal.pgen.1007667)
Supplement: S5 Table — Results are presented in rank-order from most significant to least significant. (CSV) [file pgen.1007667.s026.csv]

Gene	Number of SNV	SKAT-O p-value	Rank
LCMT2	5	3.09E-06	1
CLEC3A	2	0.000399016	2
CRISPLD2	7	0.000513864	3
PPEF2	8	0.000524473	4
OPRM1	8	0.000741177	5
ABCA4	24	0.000846431	6
ALS2CL	8	0.000851505	7
ZNF646	11	0.000901069	8
PHLPP1	4	0.00109653	9
SLIT1	5	0.001116829	10
PROSC	2	0.001249115	11
KIF19	7	0.001290199	12
OR5AK2	4	0.001306594	13
EPN3	11	0.001372555	14
ELSPBP1	8	0.001477733	15
C7orf57	5	0.001529389	16
EFCAB4B	14	0.001771196	17
TGFB1	5	0.001797993	18
KIAA0513	2	0.001809784	19
SLC1A7	8	0.00199205	20
TMEM81	4	0.002246204	21
EHHADH	9	0.002357755	22
C14orf79	3	0.002376011	23
AHSG	5	0.002444019	24
BSDC1	2	0.002491721	25
USP18	1	0.002614659	26
YLPM1	7	0.002669598	27
SERPINA5	11	0.00287166	28
APOA4	7	0.002908539	29
DST	48	0.002951366	30
TCP11L1	4	0.002958587	31
MICALL2	16	0.002995702	32
ABCB6	6	0.003022599	33
XIRP1	15	0.003047745	34
ROCK1	4	0.003104501	35
CCNJL	3	0.003159495	36
DSEL	5	0.003360896	37
CCDC28B	2	0.003418053	38
GPRC6A	7	0.003425432	39
HDGFL1	2	0.003541554	40
CAPN13	8	0.00363053	41
C3orf67	5	0.003636109	42
ITGA2	6	0.003667848	43
PPP1R15B	5	0.003714403	44
PTPRT	6	0.003742973	45
SDR39U1	5	0.003964771	46
RICTOR	5	0.003989529	47
ABCA13	51	0.004030725	48
CCDC108	13	0.004041647	49
CTNNA3	8	0.004085733	50
TEX36	5	0.004224561	51
MNS1	4	0.004249346	52
TNKS1BP1	17	0.004329687	53
ACTBL2	3	0.004470361	54
POFUT2	3	0.004543994	55
OR1L4	5	0.004577005	56
GPR137	2	0.004658654	57
FAM208A	8	0.004728785	58
RUNX1	1	0.004850661	59
SMEK2	7	0.004895903	60
MUC6	19	0.004899586	61
C9orf117	1	0.004912442	62
TEX9	4	0.004982401	63
SKIV2L	13	0.005000947	64
ARL11	4	0.005163054	65
HSPA4	3	0.005388009	66
NPHS2	6	0.005427828	67
OR10H4	6	0.005537226	68
HMCN2	32	0.005551804	69
C15orf57	2	0.005552515	70
AXIN2	9	0.005666463	71
PTTG1IP	3	0.005677157	72
POP4	2	0.00569705	73
MIER1	2	0.005715013	74
R3HCC1	6	0.005802128	75
NFKBIL1	4	0.006006013	76
TNKS	5	0.006197006	77
SLC6A20	7	0.00623293	78
ZNF446	6	0.006299373	79
DENND2A	5	0.006348878	80
KCNH8	3	0.006433225	81
C22orf31	5	0.006476667	82
GJD4	4	0.006761837	83
RPS6KC1	3	0.006795343	84
CLCA1	6	0.0068254	85
C2orf44	4	0.00690759	86
DBR1	4	0.006935826	87
PLEC	39	0.006984894	88
DAPK1	6	0.00699062	89
CTTNBP2	4	0.007633738	90
CEACAM21	6	0.007727308	91
PIF1	5	0.007813492	92
LRP11	4	0.007822608	93
ARFGAP2	4	0.007842886	94
CAPN2	8	0.007990693	95
CPA1	3	0.008010017	96
ZNF639	3	0.008071028	97
KIAA1033	3	0.008358884	98
PATE4	2	0.008395924	99
UBA6	3	0.008443721	100
DCST2	6	0.008542686	101
AGBL1	14	0.008610129	102
P2RY11	8	0.008705336	103
PPAN-P2RY11	8	0.008705336	103
BPIFC	6	0.008711244	104
INPPL1	6	0.008819003	105
OR13G1	7	0.008868551	106
TRIM58	23	0.009380984	107
MUC21	6	0.009457524	108
OGFR	4	0.009498936	109
ATP6V1F	1	0.009628876	110
CCDC67	5	0.009643122	111
C10orf99	1	0.009649654	112
FAM153B	1	0.009681294	113
SPHK1	2	0.009688828	114
WDPCP	4	0.009731056	115
HSF4	4	0.009814681	116
AJUBA	7	0.009863246	117
ZNF48	5	0.010059071	118
MRPS30	5	0.010062315	119
LMBR1	2	0.010086476	120
FAM26D	2	0.010120425	121
PARK7	1	0.010164725	122
OR2A25	4	0.01023464	123
BMPR2	2	0.010236892	124
SLC14A1	3	0.010256361	125
SLC17A2	6	0.010267708	126
CLCNKA	10	0.010269699	127
MMP28	3	0.010335191	128
ADAMTS9-AS2	2	0.010348915	129
UBE3B	7	0.01035194	130
AOC3	6	0.010355759	131
ZC3H10	1	0.010429058	132
PIGB	4	0.010548147	133
ZNF804B	20	0.010555643	134
ZNF638	9	0.010575613	135
VASH2	1	0.010652511	136
KITLG	2	0.01076138	137
KBTBD8	3	0.01084522	138
ZNF418	7	0.010862213	139
PCDHB8	6	0.011088897	140
UCP2	1	0.011092885	141
CD1A	3	0.01109646	142
SLC34A3	8	0.011099801	143
ITFG3	4	0.011104536	144
FBLN1	4	0.011262524	145
LOC100129175	3	0.011288696	146
GRIN2C	6	0.011314385	147
TICRR	15	0.011367243	148
C7orf69	7	0.011371121	149
MACC1	5	0.011641249	150
PGBD2	3	0.011644822	151
IQCA1	4	0.011651329	152
GPHB5	4	0.011668069	153
NKX2-6	2	0.011803564	154
SIT1	2	0.011811335	155
FNDC7	5	0.011854105	156
BCAM	8	0.011867124	157
BCAN	7	0.011968677	158
FBN1	5	0.011996665	159
MORC3	5	0.01206668	160
FBRSL1	8	0.012088563	161
AGBL2	5	0.012094718	162
C3orf70	1	0.012098292	163
KCNV2	3	0.012201263	164
KIAA1430	5	0.012223584	165
CHDH	4	0.012244667	166
ADAMTS9	6	0.012246517	167
NDUFA10	5	0.012252435	168
ERVV-1	3	0.012278958	169
GIPR	2	0.01235986	170
GFOD1	4	0.012371086	171
HK2	4	0.012409561	172
BMP8B	2	0.012432957	173
PPIE	2	0.012432957	173
CPSF3	2	0.012458798	174
SLC26A6	4	0.012486904	175
CRIM1	2	0.012536994	176
TMEM139	2	0.01255864	177
WDR6	4	0.012563281	178
SEMA3D	3	0.012565257	179
ZC2HC1A	2	0.012611579	180
SCG2	2	0.01262477	181
FMNL3	4	0.01265415	182
OR13C4	2	0.012680957	183
DPH7	2	0.012710499	184
CCDC91	3	0.012715324	185
TMEM86A	2	0.012715435	186
SLC4A1AP	3	0.012792197	187
RC3H1	5	0.012799134	188
C1orf86	4	0.012819562	189
DLL3	5	0.012827464	190
FAM120A	1	0.012846839	191
SMAD9	4	0.012853952	192
TOX3	5	0.012875881	193
CLEC4A	3	0.012879974	194
FAM83C	6	0.012883744	195
C15orf59	4	0.013010304	196
ANO3	6	0.013062656	197
TVP23C	4	0.013081501	198
LARS	7	0.0131808	199
CREBBP	6	0.013218651	200
SFSWAP	9	0.013249894	201
ATP5A1	4	0.013250145	202
SEC31A	5	0.013375443	203
MRGPRD	3	0.013405124	204
KLHL41	3	0.01341545	205
OSER1	1	0.013434069	206
LPCAT3	2	0.013439929	207
MTCH1	4	0.013467002	208
RAPGEF6	6	0.013469363	209
PREP	4	0.013523793	210
ZDHHC2	3	0.013552049	211
PLK1	3	0.01355694	212
TMEM123	4	0.013574209	213
C18orf25	2	0.013748957	214
GLTSCR1	4	0.013773055	215
TVP23C-CDRT4	5	0.013786382	216
MC4R	3	0.014025093	217
PAFAH2	5	0.014064935	218
KIR3DL2	4	0.014094492	219
OR1L6	8	0.014243267	220
KRTAP12-3	1	0.014278258	221
PPP3CC	2	0.014468117	222
MUT	4	0.014539305	223
KDM4A	4	0.014561596	224
SLC52A3	5	0.014621293	225
ST6GALNAC6	3	0.014627303	226
C2orf43	3	0.014685179	227
FBXO41	5	0.014734074	228
SAMD9L	7	0.014813598	229
EMR2	7	0.014852007	230
LRRK1	12	0.014882141	231
ALMS1	26	0.014894826	232
TAS2R60	3	0.014903479	233
MST1L	6	0.014945355	234
CERKL	5	0.015005562	235
GPAA1	2	0.01523348	236
OR4D2	3	0.015299253	237
C14orf159	6	0.015339367	238
PDLIM1	1	0.01549441	239
ANKFY1	3	0.015611872	240
HSPG2	41	0.015698096	241
ERN1	3	0.015827574	242
PCSK4	4	0.015846863	243
SLC26A5	3	0.015930685	244
ART1	5	0.015963084	245
PACSIN2	3	0.015970881	246
MAPT	9	0.0160881	247
OR13C3	1	0.016146159	248
COG1	7	0.016232093	249
SMYD4	12	0.016242364	250
EPHA1-AS1	5	0.01634882	251
ZNF516	9	0.01646138	252
CHAMP1	1	0.016497538	253
KIAA1244	9	0.016581507	254
PBLD	4	0.016641677	255
MFI2	9	0.01685556	256
SYCE1	5	0.016910995	257
MIEF2	5	0.017107419	258
OR2F2	5	0.017172655	259
PACS2	3	0.017191001	260
KIAA0586	13	0.017193622	261
C5AR1	4	0.017237467	262
APOA1BP	3	0.017265672	263
RESP18	3	0.017268353	264
VAV3	5	0.017313346	265
ZNF207	1	0.017314361	266
C19orf77	2	0.017324107	267
FECH	2	0.017367061	268
DARC	3	0.017386996	269
ARRDC1	3	0.017445256	270
KIT	6	0.017532609	271
RPTOR	2	0.017542477	272
MYL5	5	0.017578335	273
PIGR	4	0.017593735	274
BSCL2	4	0.017605266	275
HNRNPUL2-BSCL2	4	0.017605266	275
ARHGAP22	4	0.017657725	276
ZNF830	3	0.017729536	277
ARHGEF17	10	0.017760044	278
HSF5	3	0.017771287	279
OR6B2	3	0.017829219	280
TBRG4	5	0.017926743	281
COX4I2	2	0.017938658	282
NUDT9	2	0.017952229	283
PMS1	8	0.017953232	284
RAD54L	2	0.018122204	285
MLH1	6	0.018151566	286
ZNF33A	4	0.018242899	287
CDNF	1	0.018317796	288
DGUOK	3	0.018337511	289
DAGLB	9	0.018342215	290
PTPN1	1	0.018416044	291
VSX2	2	0.018460152	292
OR10A2	7	0.01848266	293
DYDC1	1	0.018507259	294
ALDH16A1	6	0.018560295	295
LINGO3	3	0.018677439	296
FAM120AOS	6	0.018750265	297
ANXA3	1	0.018766306	298
NAALAD2	2	0.018914502	299
SMPD3	5	0.018995297	300
DSC2	4	0.019127655	301
SMARCE1	1	0.019136872	302
NFX1	3	0.019137091	303
FAM189A1	3	0.019196359	304
KRTAP13-4	4	0.019236415	305
C9orf106	1	0.019302706	306
DDX52	3	0.019404506	307
C16orf13	1	0.019474008	308
CCL26	1	0.019485778	309
LAMA4	9	0.019499494	310
ZNF461	3	0.019500976	311
MFSD7	8	0.019510936	312
SLC26A3	4	0.01954084	313
TTC37	5	0.019658164	314
SACM1L	2	0.019723301	315
TMEM106B	2	0.019723301	315
CAPN11	8	0.019779069	316
FUZ	4	0.019831747	317
MMP3	4	0.020087557	318
PHF20L1	1	0.020100436	319
ATXN7L1	4	0.020142301	320
METRNL	2	0.020149228	321
SIGLEC9	8	0.020166618	322
FAM105B	1	0.020239431	323
CCDC88B	11	0.02027662	324
ZNF324	3	0.020293848	325
BMP5	3	0.020316636	326
HEATR5A	14	0.020342748	327
PTCHD4	2	0.020361312	328
NKAIN4	5	0.020417574	329
HLCS	3	0.020434538	330
COX20	1	0.020477223	331
HNRNPU-AS1	1	0.020477223	331
TDP1	2	0.020479033	332
TAAR5	4	0.020540061	333
ZFP42	4	0.020547552	334
AFAP1-AS1	4	0.020594198	335
DUS2	4	0.020600373	336
AFM	2	0.020602379	337
VWA5A	5	0.020606026	338
CALML4	2	0.020641032	339
PIGC	3	0.020705039	340
TM9SF1	4	0.020842425	341
LRRC9	1	0.020864477	342
TPRN	3	0.02090247	343
DUSP26	3	0.020938284	344
PBOV1	2	0.020975949	345
UBXN1	2	0.021008033	346
MMP15	3	0.021028648	347
ZNF213	2	0.021040457	348
LOC101929597	1	0.021063544	349
NEU2	4	0.021108104	350
LCE5A	3	0.021108469	351
SPRED2	2	0.021118813	352
SLC22A18AS	6	0.021122827	353
TCL1A	2	0.021144194	354
TOPAZ1	10	0.021170775	355
CXCR5	1	0.021195104	356
BPIFB1	6	0.021240061	357
TCTN2	3	0.021257537	358
BVES	3	0.021262714	359
ACTRT2	3	0.021301842	360
RTCA	2	0.021309619	361
TMEM51-AS1	3	0.021316057	362
RANBP3	4	0.021316234	363
NCK1	3	0.021317894	364
CRADD	1	0.021330954	365
METTL23	2	0.021356454	366
DDX23	3	0.021358747	367
VLDLR	3	0.021381013	368
RIBC2	6	0.021494579	369
SHISA3	1	0.02150897	370
SLC9C1	14	0.021545801	371
CLEC4M	7	0.021656856	372
OR3A2	4	0.021665505	373
OVOS2	13	0.021673129	374
APH1B	5	0.021850249	375
GLCE	3	0.021885808	376
CCDC81	8	0.02188581	377
OTUD4	3	0.021985112	378
RFX7	9	0.022026622	379
LGALS3BP	3	0.022223379	380
TNRC6B	3	0.022345946	381
SRD5A2	3	0.022360243	382
LILRA2	6	0.022419464	383
MCAM	5	0.022447477	384
GATC	1	0.022500706	385
RTN3	6	0.022521402	386
HEATR5B	2	0.022572001	387
ARNT	3	0.022645155	388
IGFL1	3	0.022660487	389
ZNF433	2	0.022831894	390
ICAM4	2	0.022880599	391
EFCAB6	15	0.022910355	392
RCBTB1	3	0.022966214	393
FOCAD	13	0.022973143	394
SUN1	10	0.022998142	395
ZNF528	9	0.022998453	396
DTWD1	2	0.023013177	397
ZNF8	3	0.023047793	398
NSRP1	6	0.023088254	399
SLC35G4	9	0.023090094	400
LGR4	5	0.023121556	401
KHSRP	3	0.023184943	402
C14orf132	2	0.023250084	403
CMPK2	3	0.023271404	404
FNDC9	4	0.023281075	405
PRKACG	1	0.023304846	406
ZNF696	5	0.023326438	407
BRD9	2	0.023378799	408
ARPP21	5	0.023436191	409
GSDMA	7	0.023460448	410
PRSS23	2	0.023501023	411
TMEM45B	3	0.023511434	412
FBXO36	3	0.023572047	413
PTGDR	4	0.023629813	414
HDGFRP2	2	0.023639146	415
IRX3	1	0.023671258	416
C9orf24	3	0.023676226	417
GSTCD	3	0.023691016	418
N4BP2L2	5	0.02377072	419
OR2W1	3	0.023834858	420
ZBTB41	3	0.023848318	421
GLDN	7	0.02393289	422
WARS	3	0.023936166	423
ETFB	4	0.024048418	424
UBE2O	5	0.024114962	425
EWSR1	2	0.02413269	426
LHPP	1	0.024227302	427
ITGA3	7	0.024244444	428
BLZF1	3	0.024258399	429
TMPRSS6	6	0.024261966	430
FBL	3	0.02435627	431
TTC16	7	0.024367061	432
WDR3	5	0.024367787	433
C1QTNF8	2	0.024370513	434
ZKSCAN2	8	0.024392152	435
JMJD4	9	0.024397187	436
IRF6	2	0.024547963	437
LOC101929571	3	0.024620389	438
WDFY3	7	0.024692882	439
HLTF	10	0.024827869	440
ZNF467	3	0.024874442	441
OR56A1	2	0.024913748	442
ATXN1L	3	0.024954497	443
BRICD5	6	0.025074713	444
CEP78	4	0.025153451	445
DGKG	6	0.025387928	446
RBBP6	4	0.02546421	447
CCDC61	4	0.025480138	448
C2orf42	2	0.025487189	449
MUC12	35	0.025544777	450
NECAB3	2	0.025551851	451
MGAT4C	2	0.025560844	452
TMTC4	5	0.025597516	453
SLC38A2	3	0.025599892	454
RHBDD1	3	0.025682256	455
KNOP1	5	0.025699419	456
SMG7	7	0.025744362	457
BAG3	6	0.02575928	458
TOB2	2	0.025879582	459
KRTAP10-11	4	0.025916006	460
LYRM2	3	0.025934118	461
PAPLN	14	0.025947415	462
ZNF649	4	0.025962373	463
ASTN1	6	0.025980828	464
CRNKL1	9	0.025989494	465
EXTL1	9	0.02600088	466
TJAP1	4	0.02601352	467
ASPSCR1	4	0.026048777	468
MGRN1	2	0.026174976	469
ANKZF1	7	0.026250629	470
S1PR5	2	0.026316478	471
LOC646999	1	0.026351106	472
VPS37A	2	0.026359255	473
ST7	1	0.026360937	474
GNAT2	2	0.026373441	475
MYO1G	7	0.026650697	476
C10orf118	5	0.026670462	477
FAM43A	3	0.026673603	478
PCDH15	15	0.026775209	479
CENPF	37	0.026935108	480
CDK18	5	0.027119612	481
NEK7	1	0.027149084	482
COX10	6	0.027222526	483
FAM221A	5	0.027466153	484
GBA2	5	0.027544833	485
AANAT	4	0.027642625	486
ZNF445	4	0.027666421	487
PLIN3	5	0.027673022	488
SEMA3E	3	0.027673885	489
CCDC15	5	0.027696644	490
USP2	4	0.027768405	491
CA1	1	0.027870223	492
CHI3L2	3	0.027880941	493
TNFRSF18	4	0.027882688	494
LRRC8E	5	0.028070777	495
RETSAT	4	0.028092135	496
TBC1D9	3	0.028175075	497
IFNLR1	2	0.02818292	498
TESPA1	7	0.028210335	499
OR5H15	7	0.028287163	500
CHGB	13	0.028298378	501
AHDC1	8	0.028328763	502
ENKD1	3	0.028331875	503
ARHGEF11	6	0.028463791	504
BIRC2	3	0.028469801	505
FOLR4	3	0.028720891	506
P2RX3	2	0.028746701	507
UVSSA	9	0.028747811	508
TBCD	13	0.0288312	509
SBNO1	5	0.028837374	510
C18orf63	3	0.028870072	511
C17orf50	2	0.028883902	512
CEP192	24	0.028986007	513
SLC7A4	5	0.029010457	514
FAM207A	1	0.029290793	515
UTRN	17	0.029355653	516
PLCD4	3	0.029534813	517
INVS	5	0.029623193	518
FAM214B	4	0.029774651	519
SCUBE1	7	0.029895958	520
CTTNBP2NL	4	0.02992716	521
OR4K5	2	0.030014288	522
MAML1	6	0.030048203	523
ZBTB4	7	0.030102709	524
GZMA	1	0.030148115	525
ARHGEF18	12	0.030210408	526
LOC643339	1	0.030309448	527
MEP1A	6	0.030353019	528
ZSCAN2	7	0.030397136	529
ADCY6	6	0.030428331	530
SLC7A14	3	0.030443358	531
TSNARE1	15	0.030451181	532
SNCAIP	4	0.030466582	533
ITIH5	8	0.030466667	534
ABCA8	10	0.030486699	535
TCF25	7	0.030511343	536
IVD	4	0.030586394	537
PPME1	1	0.030874384	538
DLG1	9	0.030907113	539
SLC22A15	1	0.030943981	540
FEZ1	2	0.030946215	541
PRG2	3	0.031109644	542
LMO7	19	0.03126534	543
GLYATL3	4	0.031350861	544
FAM13B	4	0.031359065	545
FAM92B	1	0.031399471	546
NPC1L1	12	0.031427064	547
TMEM41B	1	0.03148762	548
GPR113	20	0.03156325	549
HRNR	29	0.031578685	550
CDKL3	1	0.031692483	551
SCAF4	2	0.031698384	552
FAM26F	4	0.03170709	553
MKS1	4	0.03180503	554
CYP3A4	3	0.031820017	555
F13B	6	0.03197109	556
TMEM242	1	0.031981692	557
TARDBP	1	0.032071862	558
UGT1A5	24	0.032171974	559
RIC8B	1	0.032212422	560
IFNW1	1	0.032285429	561
INF2	6	0.032333615	562
PDHX	6	0.032342794	563
C3orf17	9	0.03257552	564
9-Sep	6	0.032579573	565
BTN3A1	5	0.03260818	566
ARHGAP11A	9	0.032708894	567
ACY1	2	0.032756436	568
SIPA1L1	6	0.032757336	569
C9orf69	1	0.032779751	570
EMR3	7	0.032821655	571
FBXO47	2	0.032954395	572
MYRFL	3	0.032969555	573
CDH3	7	0.033131844	574
OAZ3	3	0.033139856	575
CDH26	7	0.033283567	576
SCFD1	2	0.033308723	577
CST1	2	0.033327868	578
PXN	11	0.033405191	579
CCDC41	5	0.033497766	580
KCNK1	1	0.03353223	581
HNRNPH1	4	0.033578114	582
SLC6A16	4	0.033753147	583
PDP2	3	0.033770404	584
AMBRA1	7	0.033887427	585
GNLY	5	0.033904148	586
GAL3ST2	6	0.033938052	587
DYX1C1	4	0.033976244	588
C19orf12	2	0.033979792	589
CSH1	1	0.033987386	590
TMC1	3	0.033987547	591
RAB11FIP2	4	0.034053387	592
PRDM4	3	0.034106662	593
PKD1L1	29	0.03414372	594
SLC35D3	2	0.034308376	595
C11orf68	1	0.034317489	596
C17orf77	6	0.034513714	597
FKBP1A-SDCBP2	5	0.034549332	598
SDCBP2	5	0.034549332	598
ZNF441	2	0.03460474	599
DNAH8	26	0.034688364	600
DBF4	4	0.034746963	601
RAB3GAP1	2	0.034777553	602
C8orf44	1	0.034789509	603
CA13	1	0.034813953	604
RASSF10	5	0.034819932	605
PLXNA4	14	0.034919228	606
TMEM249	1	0.035011362	607
MPI	1	0.035097522	608
SPOCK1	1	0.035101586	609
CDKL4	1	0.035235014	610
KCNE2	1	0.035260042	611
GORASP2	1	0.035264397	612
ELF3	1	0.035264663	613
DDI2	5	0.035291841	614
RSC1A1	5	0.035291841	614
NCCRP1	1	0.035297951	615
HIST1H2BO	8	0.03531617	616
FBXL6	3	0.03534613	617
ZC3HAV1	6	0.035372714	618
NHSL1	1	0.035439397	619
RAPSN	5	0.035457316	620
OPALIN	2	0.035511015	621
CHP2	1	0.035513092	622
GPX8	1	0.035535539	623
MASP1	8	0.035577884	624
C12orf68	1	0.035600045	625
PRDX5	1	0.035600045	625
USP36	12	0.035602337	626
ARL6IP6	1	0.035669229	627
SKIL	3	0.035720443	628
SH2D6	2	0.035722023	629
TNIK	4	0.035731655	630
NDUFA7	1	0.035749803	631
MR1	6	0.035893879	632
FANCI	11	0.035900294	633
ZNF511	3	0.035965218	634
PODN	9	0.036030766	635
HAP1	9	0.036035813	636
LGALS16	1	0.036047597	637
ITM2C	3	0.036128055	638
OPTN	1	0.036138776	639
CFDP1	3	0.036143123	640
NELFCD	2	0.03614458	641
HEPACAM2	2	0.036145424	642
ZSCAN29	5	0.036145822	643
KCNK17	1	0.036148052	644
AKR1E2	4	0.03622215	645
C16orf97	2	0.036234109	646
CD5L	4	0.036239536	647
APOC4	3	0.036239767	648
APOC4-APOC2	3	0.036239767	648
ABCB11	5	0.036257254	649
TH	3	0.036264751	650
PDIA5	3	0.036292155	651
APOBEC3F	7	0.036299208	652
MRPS28	1	0.036341341	653
TFF2	1	0.036341341	653
FRMD1	8	0.036367127	654
KCNMB3	5	0.036405842	655
LRRC71	9	0.036427166	656
SMCO4	3	0.036456885	657
PTGES2	2	0.036482491	658
CNTN2	11	0.036521992	659
PNO1	1	0.036567248	660
PDCD7	2	0.036612243	661
SGK223	16	0.036630608	662
ATF5	3	0.036632501	663
DRD2	1	0.036656435	664
OR2B2	5	0.036669112	665
PAM	5	0.036753504	666
NIT1	3	0.036772225	667
BAMBI	1	0.036809061	668
CAAP1	1	0.036809061	668
RAB25	1	0.036809061	668
PDE3A	4	0.036883584	669
IMPA1	1	0.036885761	670
C1orf105	6	0.036916714	671
LRRC49	3	0.036928055	672
FAM149B1	2	0.036944994	673
RASL12	3	0.03697814	674
KIAA1107	6	0.036978762	675
PLD3	3	0.037054984	676
SLC35G2	4	0.037115293	677
SMG8	3	0.037117533	678
TPRA1	2	0.037221305	679
SPAG17	12	0.037226271	680
RYR1	17	0.037294699	681
COMMD5	3	0.037304229	682
GTF3C2	1	0.037364136	683
LOC100505624	1	0.037364136	683
IFNA6	2	0.037382645	684
DNASE1	12	0.037385222	685
DNAJB9	1	0.037411229	686
TMEM110	1	0.037415822	687
TMEM110-MUSTN1	1	0.037415822	687
MCL1	1	0.037569846	688
SLC22A8	1	0.037569846	688
CRNN	2	0.037999875	689
OR10H1	3	0.038019926	690
ZNF286A	4	0.038047085	691
SLC24A1	9	0.038079882	692
OR2A5	5	0.038184025	693
ANO1	6	0.038289257	694
ZCWPW2	3	0.038299967	695
STOX2	2	0.038483721	696
XPOT	3	0.038536085	697
NTSR2	3	0.038604581	698
TAP2	10	0.038657889	699
NLRP13	7	0.038669713	700
ILDR2	4	0.038701708	701
CGB7	4	0.038732825	702
KRT19	2	0.038759399	703
PWP2	7	0.038780047	704
SNAI3	2	0.038780264	705
SNAI3-AS1	2	0.038780264	705
DNM2	2	0.038821161	706
OR7E24	5	0.038875258	707
DEDD2	3	0.038930782	708
CD200	4	0.03907332	709
CWC22	5	0.039076119	710
DPH6	3	0.039090298	711
C1orf198	3	0.039135177	712
BRD7	2	0.039204897	713
L3MBTL1	2	0.039216211	714
PGA5	3	0.039285013	715
ZNF514	2	0.039285215	716
ABCG1	2	0.039303239	717
KIF26B	16	0.039315106	718
LRRC46	2	0.039341688	719
IGDCC3	4	0.039342961	720
SLCO1B3	6	0.039368782	721
DSE	5	0.039385338	722
SORCS2	21	0.039435326	723
GRAMD1B	3	0.039486149	724
CBL	3	0.039520159	725
CRLF3	1	0.039528949	726
SLC12A4	3	0.03956837	727
KRT10	4	0.039569909	728
UCMA	3	0.039578654	729
PIK3R5	3	0.039610095	730
SALL4	4	0.039620079	731
WBSCR27	5	0.039723154	732
APLP2	3	0.039830518	733
VPS13D	14	0.039836301	734
SLC7A8	3	0.039859991	735
AKT2	3	0.039861388	736
ZMIZ1	3	0.039894124	737
STRN3	4	0.039902861	738
AMBP	2	0.039927964	739
IFT57	2	0.039932128	740
ARMC9	3	0.039932807	741
METTL3	2	0.039934747	742
LRPPRC	3	0.039939593	743
TMEM198	3	0.039939593	744
VPS33B	4	0.0399735	745
AMZ1	5	0.040002589	746
MCCC1	4	0.040012855	747
SEL1L2	4	0.040046666	748
HOXD9	2	0.04005397	749
SCLT1	3	0.040063586	750
DNASE1L2	3	0.040099735	751
RAP1GAP2	4	0.040103033	752
TRIM54	3	0.040106224	753
AQP11	4	0.040132533	754
CASD1	3	0.040178126	755
AP4S1	3	0.040190382	756
DHX32	3	0.040190382	756
MAP4K4	3	0.040190382	756
PTRF	3	0.040190382	756
LOC100130093	5	0.040230415	757
CADPS	3	0.04023752	758
1-Mar	3	0.040239034	759
CCDC103	7	0.040244193	760
SULF2	4	0.040257529	761
CCT6B	7	0.040278027	762
SLC36A3	4	0.040283749	763
C2orf78	3	0.040301691	764
C10orf71	19	0.040523935	765
TMEM91	4	0.040531638	766
CLCN2	5	0.040634524	767
COLEC11	3	0.040664184	768
ZBTB20	2	0.04099696	769
VN1R4	6	0.041041806	770
OCLM	2	0.04114003	771
CLDN7	1	0.041160992	772
TP53AIP1	3	0.041169433	773
SLC9C2	2	0.041207988	774
SHANK3	3	0.041282919	775
KLK13	1	0.041304626	776
SLC2A4RG	1	0.041435603	777
C1orf204	2	0.04144719	778
RHOBTB2	2	0.04146423	779
ZNF141	2	0.04148655	780
ZFAND2A	2	0.041541958	781
SPRR2F	2	0.041553886	782
SPATS2	2	0.041593733	783
PLEKHB1	2	0.041606632	784
FRMD5	2	0.041612191	785
STMN4	2	0.041697852	786
RAPGEF5	2	0.041718928	787
TTC26	2	0.041808341	788
OR10A3	2	0.041822207	789
UPK3B	3	0.041836828	790
PLA2G2D	3	0.041845077	791
HIST1H2AH	2	0.04185263	792
NOP58	2	0.041852784	793
PRDM9	2	0.041867165	794
ZFP30	2	0.04192543	795
HOXB13	2	0.041985485	796
OVOL2	2	0.042012821	797
SEC23IP	7	0.042017298	798
DRD3	1	0.042076535	799
GRM3	2	0.042141352	800
TRMT12	3	0.042148141	801
C11orf48	3	0.042165366	802
METTL12	3	0.042165366	802
CD38	3	0.042171313	803
GUCA1B	2	0.042173645	804
LTA4H	3	0.042176157	805
ARHGAP30	9	0.04217957	806
AP2A1	4	0.042194606	807
NAA30	2	0.042209109	808
PRDM5	2	0.042209109	808
NOD1	4	0.042218365	809
OR2B6	2	0.042227849	810
FSCN1	2	0.042229531	811
NIM1	3	0.042259535	812
FOXQ1	2	0.042275358	813
PTPLAD2	3	0.04232828	814
A2ML1	6	0.042339129	815
DSCC1	4	0.042352085	816
EDC4	3	0.042361994	817
CHRNB4	4	0.042378765	818
PTCH1	4	0.042388281	819
RAD50	3	0.042394783	820
KLF10	3	0.042394783	821
MMP2	3	0.042397488	822
OXSM	3	0.042411654	823
RFWD3	5	0.042412943	824
MED13L	3	0.042413656	825
RFTN2	3	0.042413656	826
WDR43	3	0.042416095	827
CEP57	4	0.042431772	828
RNASEH2B	3	0.042434735	829
DCAF4L1	2	0.042447705	830
GCLC	3	0.042479666	831
RNF186	3	0.042480131	832
SUV420H1	3	0.042488788	833
C17orf62	2	0.042526251	834
ITGA4	4	0.04256149	835
SEC14L2	4	0.042563147	836
CCDC82	9	0.042578406	837
CYP17A1	3	0.042631107	838
CPA2	3	0.042636538	839
TTC24	4	0.042648146	840
FAM213A	3	0.042652316	841
LRRC8B	3	0.042652316	842
CCBE1	3	0.042678502	843
GAL	2	0.042719528	844
IFFO2	3	0.042761303	845
EML3	6	0.042770165	846
TGOLN2	6	0.04278745	847
ZNF114	2	0.042790816	848
DAW1	3	0.042799581	849
ELP6	2	0.042829178	850
GP2	3	0.042836724	851
SLC12A2	3	0.042836724	851
SLC2A5	3	0.042836724	851
TRIM17	2	0.042887532	852
GATA5	3	0.042902465	853
ZNF324B	2	0.042905841	854
DLD	2	0.042909295	855
MMP26	2	0.042911904	856
FAHD2B	2	0.042914222	857
AIF1L	4	0.042925703	858
AMPD3	3	0.042935643	859
MLST8	3	0.042935643	859
ACRBP	3	0.042935643	860
TGFB2	2	0.042956459	861
TMOD3	3	0.042997934	862
OR2W5	2	0.043092321	863
ADSSL1	4	0.043118734	864
RCAN2	2	0.043131709	865
LOC101928108	2	0.043132596	866
OR2A7	1	0.043139343	867
C3orf56	2	0.043156639	868
THRSP	2	0.043174669	869
NPW	1	0.043184081	870
OVOL3	3	0.04322555	871
VWA3B	13	0.04322586	872
XXYLT1	3	0.04322804	873
STARD3	4	0.043245993	874
BEND3	2	0.043273979	875
RFX1	3	0.043287474	876
NRN1L	3	0.043311413	877
TRPC6	2	0.043322827	878
CTRL	1	0.043325703	879
PLIN1	5	0.043329041	880
RYR3	16	0.043465595	881
BTN3A3	3	0.043496145	882
SCNN1G	2	0.043497726	883
IQCF6	3	0.043534346	884
PHKG1	3	0.043554744	885
EDIL3	3	0.043557612	886
RGL3	8	0.043558787	887
C19orf67	3	0.043600671	888
TRIM60	2	0.04363318	889
PPM1D	3	0.043636355	890
SENP6	5	0.043658182	891
RBM12	3	0.043660091	892
NRG3	5	0.043674789	893
KLHL10	3	0.043700101	894
ANKRD2	3	0.043732967	895
GJB6	2	0.043743625	896
SGK2	3	0.043771769	897
FXYD3	6	0.043788044	898
AGAP2	3	0.043810047	899
TIMM22	3	0.043810047	899
OSGIN2	3	0.043811811	900
PSKH2	5	0.043828336	901
RBM26	3	0.04388179	902
MYO1B	3	0.043930077	903
PGPEP1	3	0.044040879	904
TOMM40L	3	0.044053469	905
TP53I13	3	0.044067959	906
CLPB	2	0.044087272	907
HIVEP1	17	0.044179432	908
IMMP1L	2	0.044187789	909
NPDC1	3	0.044206444	910
XRN2	2	0.044246221	911
CLEC4F	10	0.044274153	912
KRT36	5	0.044325118	913
PGPEP1L	6	0.044336181	914
IBTK	4	0.044347563	915
PHPT1	2	0.044355732	916
SUSD2	7	0.044421225	917
DGKA	2	0.044458838	918
CCL17	2	0.044528931	919
ACO2	4	0.044635477	920
SERPINE3	2	0.044649358	921
SLC26A8	8	0.044730237	922
PSMB11	4	0.044755845	923
IGF1R	2	0.044852004	924
AGAP3	2	0.045025508	925
GJB4	4	0.04518512	926
TUBGCP2	4	0.045185424	927
OXTR	3	0.045223285	928
SAA2-SAA4	5	0.045248833	929
SAMSN1	5	0.045253712	930
DUOXA1	4	0.045256449	931
LOC400794	4	0.045346523	932
LRRC52	4	0.045346523	932
MRGPRX2	4	0.045450098	933
SORT1	4	0.045462773	934
RAB38	2	0.045520167	935
PABPN1L	5	0.045544318	936
TRIM24	3	0.045798936	937
GAREML	2	0.045816794	938
CCDC141	16	0.0458727	939
TRIM40	7	0.045943082	940
PTGFR	2	0.045989758	941
SCMH1	3	0.046112234	942
GPR75-ASB3	12	0.046114935	943
IL36B	2	0.046218082	944
IRG1	2	0.046241433	945
TTN	219	0.046389403	946
RUSC1	3	0.046517112	947
BBOX1	3	0.046552288	948
LMNB2	3	0.046640975	949
PALLD	11	0.046665901	950
GCAT	5	0.046673041	951
FNDC3B	4	0.046760318	952
MC3R	2	0.046881079	953
CCDC3	2	0.046920141	954
TBPL2	3	0.04698931	955
CLEC19A	1	0.047190612	956
ZNF469	38	0.047314545	957
PIGT	4	0.047316534	958
BCL2L14	4	0.047349765	959
SAMD15	6	0.047470809	960
AMPD2	3	0.04756654	961
ENPP3	4	0.047574035	962
GYPC	4	0.047623349	963
ARAP2	9	0.0476333	964
ANKRD33	10	0.047688532	965
ZNF195	4	0.047770925	966
LRRIQ1	13	0.047780468	967
PARP15	6	0.047912196	968
UNC45B	7	0.047948215	969
SEC14L4	7	0.048031683	970
C6orf223	5	0.048147254	971
TIGD5	4	0.048173556	972
GPER1	4	0.048380887	973
ZNF572	4	0.048644858	974
MYLIP	5	0.048679105	975
TAS2R16	1	0.04872598	976
GYLTL1B	4	0.048781287	977
MFF	2	0.048835781	978
FAM160A1	4	0.04884888	979
HOXB1	4	0.049010475	980
TSPYL4	6	0.04915975	981
ADAM23	5	0.049213242	982
FUT1	3	0.049292148	983
OR13F1	6	0.049299313	984
SIL1	3	0.04940199	985
OR8K3	4	0.04948801	986
SPATA13	9	0.049544944	987
RIN3	7	0.049609623	988
COQ4	2	0.049626077	989
NUDT16	3	0.049825615	990
MYH10	6	0.049827324	991
OR1Q1	4	0.049835713	992
TSSK4	3	0.049886997	993
C17orf66	5	0.049969907	994
OR1L8	5	0.050233098	995
TMX2-CTNND1	8	0.0503204	996
GIGYF2	4	0.050405644	997
HK1	2	0.050516895	998
PADI1	4	0.050552817	999
LRRFIP1	8	0.050713551	1000
SEMA4A	2	0.050782785	1001
LMNB1	4	0.051023026	1002
PRSS3	5	0.051116093	1003
ADAM22	4	0.051299555	1004
NCOA4	5	0.051494361	1005
TIMM23B	5	0.051494361	1005
ATP13A2	8	0.051527787	1006
FAM198B	4	0.051733461	1007
RPS6KA1	4	0.051802549	1008
C3orf18	3	0.051961828	1009
ZNF729	7	0.052011821	1010
RUSC1-AS1	5	0.052024269	1011
SOS1	5	0.052042417	1012
RNF207	6	0.052075187	1013
GRIN3B	22	0.052144962	1014
VPS11	4	0.052150765	1015
GHRL	3	0.052247634	1016
GHRLOS	3	0.052247634	1016
DEFB129	2	0.052461983	1017
BTNL10	4	0.05248906	1018
USP28	6	0.052498984	1019
RHBDF2	5	0.05251422	1020
LARP4B	4	0.052779928	1021
OR52E4	8	0.053029474	1022
ICK	3	0.053075471	1023
NME8	7	0.053177467	1024
TTI1	4	0.053335525	1025
CAPN12	7	0.05358883	1026
MUC15	4	0.053625827	1027
CCDC42	3	0.053681038	1028
EFHC1	6	0.053758688	1029
OR6Y1	5	0.053856771	1030
OR2L2	5	0.054000933	1031
FAM160B1	1	0.05414946	1032
SERPINA3	5	0.05416208	1033
XKR9	4	0.054170087	1034
NT5E	4	0.054360189	1035
ZBTB38	3	0.054376111	1036
BAI2	5	0.054444711	1037
MKI67	53	0.054490189	1038
TRIM67	3	0.054548214	1039
C6orf1	3	0.054556774	1040
CIT	9	0.055105691	1041
TDP2	6	0.055574488	1042
FAM178A	7	0.055654148	1043
FBXO39	9	0.055668677	1044
CDHR3	8	0.055797555	1045
RNASEL	8	0.055803876	1046
DOC2A	2	0.055816676	1047
RFPL1	3	0.055816677	1048
RFPL1S	3	0.055816677	1048
PRDM2	11	0.055861269	1049
KAZN	8	0.055958341	1050
SCN10A	19	0.056243359	1051
C22orf42	3	0.056297332	1052
CTIF	2	0.056313154	1053
SFTPD	5	0.056536101	1054
LCORL	6	0.056558448	1055
SEC13	1	0.056734221	1056
OR4A16	11	0.056845788	1057
LRCH1	4	0.056944481	1058
ABCB4	3	0.056993654	1059
ABL1	5	0.057059799	1060
LOC101927462	6	0.057063416	1061
MRPL1	3	0.057275113	1062
ALOX15B	6	0.057351398	1063
CACNA1A	9	0.057375497	1064
FER	3	0.057522656	1065
NUDCD3	2	0.057686797	1066
NUP153	9	0.057751908	1067
POM121C	5	0.057754464	1068
SPDYE5	5	0.057754464	1068
STX11	7	0.057914142	1069
MRPL45	2	0.057983749	1070
MICB	8	0.058294351	1071
IGFALS	4	0.058382371	1072
FAM160B2	8	0.058426304	1073
TTN-AS1	116	0.058452294	1074
MAML3	4	0.058480733	1075
UPF2	6	0.058503322	1076
GABBR2	1	0.058863991	1077
OR5K3	4	0.05889831	1078
C9orf163	1	0.058984439	1079
EXD3	18	0.059043072	1080
ZNF530	5	0.059157615	1081
ZFHX3	23	0.059157901	1082
MIA2	6	0.059199412	1083
GPRIN3	8	0.059235015	1084
ST8SIA3	1	0.059253519	1085
CNTD2	3	0.059327083	1086
POU2F3	4	0.059329282	1087
ITGAE	20	0.059495584	1088
THEG	7	0.059543415	1089
CAPG	5	0.059628945	1090
OR7D4	5	0.05981452	1091
PIGP	1	0.059945792	1092
TNRC6C	6	0.05997494	1093
UNC93A	10	0.060166416	1094
PLB1	13	0.060277804	1095
DHRS4L2	8	0.060298315	1096
PTPRB	19	0.060312946	1097
ALDH5A1	5	0.060572134	1098
GIN1	1	0.060594733	1099
PLA2G4E	4	0.060647282	1100
CLEC7A	1	0.060849687	1101
SMR3A	5	0.060855286	1102
MTG2	5	0.060923519	1103
TRIP6	3	0.061226491	1104
CCDC38	5	0.061299192	1105
C1QTNF5	7	0.061527103	1106
MFRP	7	0.061527103	1106
DNAH11	36	0.061567473	1107
SEC23A	4	0.061757065	1108
C1orf173	15	0.061784928	1109
XDH	16	0.061896578	1110
MGMT	4	0.061919413	1111
MPRIP	6	0.062089608	1112
IRAK2	7	0.062288765	1113
NCAN	4	0.062321586	1114
TMEM194A	3	0.062347427	1115
PDE6B	8	0.062583052	1116
GPR75	5	0.062667632	1117
POC5	6	0.06271114	1118
ALG1L9P	4	0.062763702	1119
FAM86C1	4	0.062763702	1119
CRYBA1	2	0.063086303	1120
FMO3	3	0.063094272	1121
MDN1	26	0.063342889	1122
MRPS24	2	0.063365367	1123
CELSR3	15	0.063548171	1124
BCLAF1	15	0.063643505	1125
CNTROB	4	0.063741081	1126
SRSF9	1	0.063746316	1127
ENPP2	4	0.063870749	1128
LOC554223	10	0.063952879	1129
PIGG	10	0.063970105	1130
CHRNA2	3	0.064555436	1131
C17orf70	9	0.06458304	1132
LOC100652824	7	0.064692127	1133
CYHR1	3	0.06480544	1134
NUP98	6	0.064857747	1135
DNAJC17	3	0.065115499	1136
OR12D3	3	0.065214237	1137
FPGS	3	0.065332932	1138
DAG1	6	0.065393453	1139
CPZ	8	0.065496766	1140
KRTAP24-1	3	0.065546975	1141
KIAA0226	10	0.06573607	1142
WFS1	15	0.06576773	1143
OR10G3	6	0.065984521	1144
URB2	6	0.066179272	1145
KIF20A	4	0.066264946	1146
MAGEL2	7	0.066393959	1147
ZNF891	7	0.066394031	1148
SHISA7	3	0.066502352	1149
KRTAP19-5	1	0.0665679	1150
SLC16A9	3	0.066801623	1151
ERAP2	6	0.066848481	1152
MYOM1	14	0.066894675	1153
JPH4	3	0.066902587	1154
PRR23C	3	0.067026751	1155
YIPF7	1	0.067264533	1156
DHRS4L1	2	0.067715104	1157
TBC1D14	3	0.067790954	1158
LIG4	2	0.067791214	1159
ABHD17A	1	0.06786661	1160
C8G	3	0.067971749	1161
LY6D	1	0.068081544	1162
OR1I1	10	0.068098339	1163
KIAA1429	8	0.068158451	1164
NLRP4	12	0.068320418	1165
DLG5	8	0.068328735	1166
VPS9D1	6	0.068632544	1167
RADIL	18	0.068743579	1168
OPN3	7	0.068784164	1169
GPR146	3	0.068930374	1170
FAM208B	20	0.068948909	1171
PKD1L3	21	0.069037616	1172
ZC3H12C	4	0.069174676	1173
OR4D1	4	0.069200762	1174
TRPM4	3	0.069259773	1175
SYNGR4	3	0.069283804	1176
ARHGEF33	5	0.069337222	1177
GRXCR2	3	0.069521719	1178
PIH1D1	4	0.069521719	1178
ZNF358	2	0.06952172	1179
CNPY3	1	0.069740914	1180
RPL28	6	0.069864984	1181
SDC2	2	0.069871786	1182
WDR17	14	0.069905602	1183
ZSCAN20	8	0.069991895	1184
ZNF428	10	0.070316199	1185
BEST3	5	0.070344208	1186
CERS4	3	0.070571577	1187
LIPC	4	0.070669625	1188
VN1R2	3	0.070760832	1189
TMCO4	12	0.070942124	1190
ESF1	3	0.071168229	1191
TRIM4	4	0.071245086	1192
LRRC6	4	0.071270985	1193
CD80	2	0.071797311	1194
GPR115	3	0.071850983	1195
TAS2R8	4	0.071878587	1196
BTN2A1	7	0.071901942	1197
ECSIT	2	0.071911332	1198
PKLR	4	0.072130517	1199
KHNYN	9	0.072171825	1200
MASP2	8	0.072192941	1201
KRTAP26-1	3	0.072501262	1202
XKR7	1	0.072782091	1203
SYTL1	3	0.072857901	1204
EXOC3L4	12	0.072862408	1205
OR56B4	1	0.072943601	1206
ARHGAP42	3	0.07332361	1207
PIK3AP1	5	0.073433024	1208
YARS2	1	0.073804661	1209
CDC42BPG	6	0.074057082	1210
TST	3	0.074201106	1211
SF3B2	6	0.074488146	1212
ZSCAN9	1	0.074576057	1213
LYPD4	2	0.074650978	1214
ART5	3	0.07502836	1215
C5orf38	3	0.075037182	1216
ALG11	3	0.075116121	1217
RNASE9	3	0.075190681	1218
TEX14	7	0.075321994	1219
ACER2	1	0.07549604	1220
GLRX3	1	0.075641701	1221
SPATA17	4	0.075801743	1222
SLC35G6	1	0.075833245	1223
FZD4	4	0.07604	1224
TXK	4	0.076061326	1225
DYNC2LI1	7	0.076122782	1226
OR2F1	5	0.076154543	1227
PHKB	10	0.076241018	1228
TERT	3	0.076319232	1229
HFM1	4	0.076392403	1230
MVB12A	3	0.076563572	1231
CRIP3	1	0.076604389	1232
ANKS6	3	0.076606548	1233
TMC5	13	0.076687055	1234
BLOC1S5-TXNDC5	2	0.076977583	1235
TXNDC5	2	0.076977583	1235
TM7SF2	5	0.077047305	1236
CCND3	2	0.077062547	1237
CDC25C	2	0.077062547	1238
PLEKHA4	10	0.077443642	1239
LOC729020	3	0.077451469	1240
ADCY4	5	0.077526076	1241
PIH1D2	2	0.077572272	1242
KATNAL2	12	0.077593956	1243
UGT3A1	7	0.078020332	1244
SRSF4	3	0.078058022	1245
GJA4	4	0.078071939	1246
MYLK4	4	0.078188609	1247
OR52J3	6	0.078211267	1248
LRP4	10	0.078317527	1249
SELO	8	0.078422935	1250
URGCP-MRPS24	7	0.078634863	1251
MRPL43	7	0.078772058	1252
EFHB	8	0.078797521	1253
L2HGDH	7	0.078938464	1254
TCEB3B	9	0.079108696	1255
ZNF766	3	0.079180877	1256
RFNG	1	0.079312553	1257
KANK3	3	0.079365696	1258
ZNF181	8	0.079437837	1259
HAS3	5	0.07949712	1260
ARSK	1	0.079711919	1261
ADSS	1	0.07975322	1262
KNCN	1	0.079959529	1263
ZMYM5	9	0.080070308	1264
CHST6	2	0.080183502	1265
FXYD2	3	0.080427089	1266
FXYD6-FXYD2	3	0.080427089	1266
RPAP1	10	0.080539562	1267
BRWD1	8	0.080546721	1268
FAN1	9	0.080561127	1269
UTP14C	5	0.080563224	1270
SULT2B1	2	0.0805681	1271
LOC100130357	3	0.080697862	1272
TCN1	5	0.080825666	1273
TTF2	9	0.080921355	1274
TPD52L3	3	0.080952591	1275
ADAMTS14	16	0.081194153	1276
STX2	3	0.08138612	1277
MTHFSD	6	0.081460941	1278
DHX33	9	0.081461871	1279
CHML	2	0.081510581	1280
SPATC1L	6	0.081566295	1281
MIS18BP1	7	0.081713994	1282
PPRC1	9	0.081789673	1283
NBPF7	4	0.081872784	1284
MAK	2	0.081901836	1285
TMEM80	8	0.082017894	1286
RHAG	2	0.082086523	1287
FASTKD5	2	0.082226118	1288
CYTL1	2	0.082281636	1289
GPNMB	6	0.082307285	1290
HTR3B	3	0.082522289	1291
OSCP1	7	0.082562609	1292
MEIOB	3	0.082592414	1293
KCNH3	6	0.082689766	1294
C1orf127	15	0.082719775	1295
ADAM29	8	0.083048764	1296
MYH13	16	0.083144115	1297
TIAM2	9	0.083242653	1298
ERBB3	3	0.083502522	1299
RARG	3	0.08358425	1300
DNAH5	26	0.083704739	1301
TNIP1	6	0.083783579	1302
MCHR1	7	0.084341452	1303
FGGY	4	0.084390201	1304
MMP17	9	0.084603464	1305
C11orf83	2	0.084753917	1306
CDK7	2	0.084753917	1307
OR2V2	2	0.084753917	1307
TDGF1	2	0.084753917	1307
THEMIS2	2	0.084753917	1307
GSTO1	2	0.084754088	1308
EPHA8	11	0.084820154	1309
CDH12	7	0.084836605	1310
IL12RB2	3	0.084933961	1311
WISP1	6	0.084945107	1312
ICAM3	6	0.08495585	1313
CELA1	10	0.08497735	1314
KLC3	8	0.084988555	1315
TDRKH	5	0.085020884	1316
PFKL	8	0.085027495	1317
NKIRAS2	1	0.08537828	1318
MPP7	3	0.085470196	1319
C16orf90	2	0.085483585	1320
GPR37	4	0.085486817	1321
MN1	4	0.085516245	1322
C12orf29	1	0.085554405	1323
HIST1H1T	5	0.08557162	1324
PDE6A	7	0.085690049	1325
AQP4-AS1	1	0.085712005	1326
CHST9	1	0.085712005	1326
STRC	9	0.085786702	1327
KIF12	3	0.085935748	1328
HERC5	3	0.085936181	1329
ATF7IP	7	0.08597445	1330
DNAH2	37	0.08598709	1331
LOC101928843	2	0.085997798	1332
LRRC48	4	0.086138209	1333
OR4C46	8	0.086160106	1334
DHRS4-AS1	3	0.086180701	1335
OR51G2	2	0.086282746	1336
OR10G2	7	0.086742102	1337
UTS2B	1	0.086836826	1338
UGT1A6	29	0.086851104	1339
SRMS	9	0.086855833	1340
SLC2A14	4	0.08687435	1341
ZNF841	5	0.0869355	1342
KCNG4	10	0.086999745	1343
ZNF394	3	0.087004855	1344
TOE1	2	0.087077658	1345
OR2AT4	3	0.087665856	1346
FBXO5	5	0.087701906	1347
CCNA2	2	0.087763677	1348
CKAP2	3	0.087845113	1349
PEG3-AS1	1	0.087867138	1350
UGT1A10	37	0.087940565	1351
TMEM234	5	0.088083382	1352
GANAB	2	0.088204849	1353
DENND2C	14	0.08820683	1354
EFCAB13	9	0.088449487	1355
NRXN3	5	0.088456779	1356
TP53RK	3	0.088468717	1357
COL10A1	5	0.088619413	1358
DNAJC5G	1	0.088631594	1359
AMOTL2	5	0.088649142	1360
CAMTA2	7	0.088707875	1361
CCDC144NL	1	0.08871085	1362
PAFAH1B2	2	0.089004812	1363
KANK4	9	0.0891694	1364
CA3	1	0.089256692	1365
ZNF154	6	0.089280495	1366
TAF6L	3	0.089318941	1367
PPM1E	2	0.089531784	1368
NCOR2	12	0.089570162	1369
ADM5	1	0.089734359	1370
SPATA9	2	0.089848389	1371
LAMB3	8	0.089944246	1372
UNC80	6	0.089955594	1373
ATAD3C	5	0.090074255	1374
DIS3L	7	0.09007487	1375
SH3BP5	4	0.090225363	1376
CARD14	11	0.090521684	1377
ZNF586	1	0.090642711	1378
ICOSLG	6	0.0909159	1379
GSTP1	3	0.091037471	1380
IQCC	5	0.091038764	1381
KIAA0319L	5	0.091206015	1382
EPN2	1	0.091212138	1383
HIST1H1C	1	0.091425868	1384
SHANK2	8	0.091461905	1385
METTL20	4	0.091490639	1386
ZNF135	6	0.091623289	1387
DDHD1	3	0.091766504	1388
IFNA14	2	0.092068573	1389
ADCY2	5	0.092110396	1390
PHF15	3	0.09215366	1391
KRT14	2	0.092264003	1392
RARS	2	0.092264003	1393
INPP5B	3	0.092264074	1394
MEGF9	1	0.092284416	1395
SLCO1B7	7	0.092406828	1396
CABIN1	9	0.092775461	1397
COL18A1	19	0.092807788	1398
TTC21A	9	0.092889686	1399
SLC26A4	8	0.093111012	1400
SLC44A5	4	0.093115861	1401
PDLIM5	9	0.093141526	1402
ZNF284	5	0.093393599	1403
C7	5	0.093401512	1404
ARHGAP29	5	0.093442578	1405
ZKSCAN3	7	0.093795576	1406
INMT	9	0.093923868	1407
TRAPPC3L	3	0.094038879	1408
TAPBPL	8	0.094039677	1409
GLT1D1	4	0.094290475	1410
FMO9P	1	0.094399051	1411
STXBP2	5	0.094432297	1412
SH2D3C	6	0.094462072	1413
SEMA3C	3	0.094527701	1414
NES	8	0.094567101	1415
RASGRP3	6	0.094573092	1416
IL12B	3	0.094590984	1417
SDF2L1	3	0.094655347	1418
ZNF491	4	0.09469474	1419
P2RY2	5	0.094812312	1420
TTYH3	6	0.094839288	1421
PABPC3	5	0.094881181	1422
ACTRT3	3	0.094953677	1423
SDHD	2	0.094959237	1424
PDPR	6	0.095001464	1425
C9orf84	16	0.095183008	1426
ZNF347	8	0.095461976	1427
ABCC2	14	0.095791088	1428
KRT7	3	0.095800355	1429
AIRE	7	0.095983131	1430
AHCTF1	8	0.096038079	1431
TMCO3	3	0.096050005	1432
FAM216A	2	0.096287815	1433
DPYD	8	0.09633334	1434
ALDH1B1	4	0.096371535	1435
ZNF30	8	0.096466083	1436
L1TD1	9	0.096720279	1437
DNALI1	3	0.096818548	1438
HGFAC	8	0.096868318	1439
KRT76	7	0.097131561	1440
LAMC2	11	0.097239595	1441
TTC28	7	0.097368167	1442
PIGQ	8	0.097579358	1443
KIAA1522	13	0.097763381	1444
KRT32	11	0.09777858	1445
CYP4A11	2	0.097787841	1446
WFIKKN2	2	0.097848009	1447
ZNF519	8	0.097880087	1448
PDE4B	2	0.097921517	1449
ZSWIM2	7	0.097936562	1450
APOL1	7	0.0979842	1451
ROM1	5	0.098143669	1452
METTL21B	4	0.098411652	1453
ZNF703	2	0.098468436	1454
MYLK	16	0.098536038	1455
RGS11	6	0.098545159	1456
MON2	8	0.098577417	1457
LPHN3	9	0.098616705	1458
OR1F1	5	0.098670062	1459
EFCAB12	4	0.098708968	1460
ZNF20	2	0.098851958	1461
LRP1B	27	0.098862343	1462
C2orf81	2	0.098921379	1463
ZNF808	5	0.098927244	1464
PIEZO1	33	0.098990747	1465
MIPEPP3	2	0.099019149	1466
ZDHHC20	2	0.099019149	1466
TNFAIP3	2	0.099027354	1467
TMEM232	9	0.099027726	1468
ARHGAP9	8	0.099052991	1469
HEATR2	7	0.099055026	1470
TRMT13	7	0.09910087	1471
AMER2	5	0.099102204	1472
ABCA3	8	0.099133726	1473
DNER	2	0.09918887	1474
DPM2	3	0.099229873	1475
SLC25A37	2	0.099232862	1476
TMEM89	1	0.099260048	1477
AGAP11	1	0.099285208	1478
TAX1BP1	3	0.09935821	1479
PCDHGB5	43	0.09940634	1480
UPF1	2	0.099434935	1481
MFSD4	3	0.099449399	1482
ASB3	4	0.099566781	1483
EVC	9	0.099674147	1484
CCL14	3	0.099714701	1485
YJEFN3	2	0.099798063	1486
ANKHD1	4	0.099929201	1487
ANKHD1-EIF4EBP3	4	0.099929201	1487
EPB41L4A	18	0.10019139	1488
DEFB116	2	0.100279585	1489
CD200R1	7	0.100304272	1490
KCNJ5	2	0.100340742	1491
ZNF415	8	0.100365473	1492
GPRC5A	2	0.10044151	1493
MBTPS1	4	0.100596713	1494
MBP	2	0.100694487	1495
PDCD1	2	0.10071181	1496
EP400	12	0.100739543	1497
SLC4A3	7	0.100870103	1498
BLM	6	0.100994039	1499
CYP7B1	3	0.101080454	1500
ZNF263	6	0.101201287	1501
C3	7	0.101496116	1502
FAM91A1	3	0.101616425	1503
ENSA	3	0.101659832	1504
TMEM155	2	0.10177556	1505
HIST1H4G	1	0.101810168	1506
WFDC8	3	0.101819391	1507
SETX	16	0.101919913	1508
LMF1	6	0.101940668	1509
NFASC	8	0.101949171	1510
ECD	8	0.102021813	1511
PPP2R5C	2	0.102080685	1512
NUDT12	6	0.102103414	1513
COL24A1	8	0.102246766	1514
EIF3K	5	0.102255425	1515
SECISBP2	1	0.102327446	1516
ZNF404	4	0.102778666	1517
S100A2	1	0.102923249	1518
PRR23A	2	0.102973385	1519
SPATA31E1	27	0.103033995	1520
OR9I1	5	0.103075971	1521
NFU1	1	0.103182245	1522
ISM2	5	0.103369821	1523
PPP1R7	4	0.103387071	1524
TMC8	8	0.103622276	1525
PON3	5	0.103660155	1526
SELPLG	6	0.103844844	1527
ZACN	5	0.103848716	1528
AQPEP	9	0.103879384	1529
TMC7	7	0.103889674	1530
GSTZ1	3	0.103949765	1531
NCLN	2	0.104279139	1532
ZNF619	7	0.104306367	1533
LOC100131047	4	0.104392112	1534
LCE2D	1	0.104838165	1535
CUL7	11	0.104870587	1536
KIAA1751	18	0.105092557	1537
ENTPD4	3	0.105121782	1538
PDPN	2	0.1053741	1539
KIF4B	12	0.105378098	1540
KIAA1432	7	0.105720788	1541
OR6K6	4	0.105887491	1542
HYAL4	4	0.105937535	1543
PARP10	6	0.105973937	1544
ZCCHC9	1	0.106032954	1545
ZNF282	4	0.106142662	1546
GOLGA4	10	0.106316109	1547
GALC	8	0.106452772	1548
ACHE	4	0.106720058	1549
KRT24	2	0.10691401	1550
CSRP2BP	6	0.106982366	1551
PET117	6	0.106982366	1551
SMIM20	4	0.107063918	1552
PSTPIP2	4	0.107092651	1553
SLC36A2	4	0.107151411	1554
SIDT2	5	0.107216731	1555
PCNXL3	12	0.10731511	1556
CRIPAK	9	0.1074081	1557
ACIN1	6	0.107465323	1558
GPR144	15	0.107604174	1559
MSS51	5	0.107613408	1560
USP47	5	0.107769913	1561
ZDHHC13	4	0.107875573	1562
RAD52	3	0.108050213	1563
HPS1	7	0.108151477	1564
TNFRSF13B	6	0.108205042	1565
CCDC8	5	0.108319055	1566
HCG4	9	0.108357162	1567
FAT3	19	0.10838117	1568
RAB42	3	0.108400695	1569
CLEC3B	1	0.108442928	1570
FARS2	2	0.108534048	1571
GPATCH11	2	0.108693874	1572
REEP4	3	0.108943464	1573
MCF2L2	8	0.109058636	1574
OTUD7B	4	0.109100184	1575
GPX1	1	0.109123852	1576
PRSS45	3	0.109191893	1577
TFB1M	2	0.109374492	1578
DEAF1	5	0.109407496	1579
TMTC1	3	0.109454791	1580
ALG14	4	0.109523835	1581
HIF1AN	1	0.109616743	1582
NKAIN3	1	0.109640516	1583
CCT3	1	0.109690002	1584
CYFIP2	6	0.109762908	1585
PWWP2A	4	0.109785359	1586
LRRC18	4	0.109785773	1587
SH2D4A	6	0.109917802	1588
CLEC1B	2	0.109917857	1589
SGIP1	5	0.109923493	1590
TTC28-AS1	4	0.110274104	1591
DBF4B	5	0.110406743	1592
CYP2W1	5	0.110417601	1593
THAP3	6	0.110460837	1594
SPATA6L	5	0.110747602	1595
RGR	2	0.110765067	1596
IGFN1	36	0.110808401	1597
CAD	4	0.110882667	1598
EXOG	4	0.110891463	1599
PDXDC1	6	0.110892664	1600
KLK3	4	0.110978635	1601
MRPS21	4	0.111051702	1602
HMMR	6	0.111282703	1603
MPO	6	0.111521772	1604
SARM1	3	0.111694969	1605
H3F3C	1	0.111707876	1606
PSMB8	4	0.111895607	1607
BTBD8	4	0.112132815	1608
SRPK1	2	0.112196662	1609
TMEM99	7	0.11220107	1610
ARIH2	5	0.112257278	1611
LRCOL1	2	0.112321073	1612
FSCN2	6	0.112391395	1613
UGT8	2	0.112393564	1614
PCOLCE-AS1	5	0.112593217	1615
RAD1	2	0.112597795	1616
GFRA2	1	0.112696654	1617
GPR176	1	0.112983638	1618
LOC100505549	4	0.113059316	1619
TPTE	17	0.113329816	1620
ARGFX	4	0.113389171	1621
GPR15	1	0.113409708	1622
C2orf73	4	0.113440185	1623
TNFRSF8	5	0.11350017	1624
MTMR3	8	0.113555771	1625
ABCC11	16	0.113699536	1626
MRPL28	4	0.11370429	1627
SIM1	2	0.113769619	1628
PRR21	5	0.113944026	1629
PRUNE2	34	0.113979561	1630
RASSF6	7	0.113994845	1631
UBE2S	4	0.114342881	1632
ZNF777	3	0.114375674	1633
REG1B	2	0.114544301	1634
XPO5	3	0.114599058	1635
SGPL1	2	0.114654533	1636
RAD9B	2	0.11468692	1637
GALR3	3	0.114704731	1638
ACSBG1	4	0.114746216	1639
MAGI3	6	0.114846677	1640
IER2	1	0.114880659	1641
CROCC	19	0.114905433	1642
C5	4	0.114929886	1643
THEM4	3	0.114950473	1644
OSCAR	3	0.114957803	1645
CROT	2	0.115039886	1646
SEC16B	15	0.115139146	1647
FETUB	3	0.115514925	1648
C21orf2	5	0.11552152	1649
RTEL1	16	0.115756004	1650
TTC30B	5	0.115875293	1651
C2orf57	3	0.115968917	1652
IL4R	15	0.115983018	1653
TBC1D29	2	0.116007572	1654
OR8J3	4	0.11606948	1655
ERC2	4	0.116108623	1656
GOLGA7B	1	0.116228669	1657
OR11H4	2	0.116243117	1658
KCNK18	5	0.11627108	1659
PDIA4	5	0.11633037	1660
LIPN	3	0.116397713	1661
MAP4K5	3	0.116504911	1662
CXXC11	7	0.116559472	1663
COL6A1	4	0.116681276	1664
FREM3	14	0.116931303	1665
TNFSF9	3	0.116961937	1666
ANXA9	4	0.116987425	1667
FDXR	4	0.117021352	1668
MTMR11	5	0.117112863	1669
GTPBP3	3	0.117126422	1670
SPATA21	4	0.117266858	1671
FAM179B	5	0.117365546	1672
SH3D19	10	0.117481843	1673
DNAJC13	14	0.117721661	1674
TCOF1	13	0.117817852	1675
KIAA0141	4	0.117944399	1676
C11orf40	4	0.11799962	1677
C19orf53	1	0.118164203	1678
TLR2	4	0.118296624	1679
CLDN23	3	0.118391179	1680
FASTKD1	2	0.118414436	1681
TIAF1	2	0.118421546	1682
PKHD1	27	0.118449281	1683
CD226	3	0.118476513	1684
15-Sep	2	0.118527737	1685
WDR81	8	0.118602103	1686
CDKN2A	2	0.118823576	1687
OR10J3	2	0.118996476	1688
CDH19	3	0.119216452	1689
TTC12	4	0.119260456	1690
PRRC2B	17	0.119304944	1691
KRTAP11-1	2	0.119344858	1692
LTBP1	15	0.119588356	1693
OR5M1	4	0.119595801	1694
KANK2	11	0.11967029	1695
TSKU	4	0.11989354	1696
BSPH1	1	0.119918411	1697
TMEM179B	3	0.120005617	1698
NKD2	5	0.120018297	1699
KRTAP19-4	1	0.12012824	1700
UGT1A7	34	0.120228211	1701
MIOX	4	0.120551242	1702
PHF14	4	0.120616844	1703
ST5	5	0.120932314	1704
MORC1	9	0.120969944	1705
ARL5C	3	0.121073949	1706
MATN2	11	0.121091339	1707
DNM1L	1	0.121323669	1708
DZANK1	9	0.121389713	1709
RECQL5	10	0.121484833	1710
NOP2	6	0.121568267	1711
FAM124B	2	0.121635566	1712
EPHA7	4	0.121716512	1713
PIWIL4	8	0.121733343	1714
CAPS2	5	0.121872436	1715
PTPLAD1	2	0.121890055	1716
ZSCAN4	3	0.121910962	1717
ADAMTSL4	11	0.121959537	1718
CER1	2	0.122012117	1719
FAT2	30	0.122205475	1720
AIFM2	4	0.122423925	1721
MOGAT2	3	0.122735413	1722
USP29	7	0.122765929	1723
OR2J2	8	0.122928937	1724
VWA2	7	0.122953875	1725
DNAJC10	7	0.122992492	1726
KRT5	6	0.123117009	1727
LAMB1	11	0.123235328	1728
ALG3	3	0.123268678	1729
CD207	8	0.123300223	1730
SQRDL	1	0.123338883	1731
PDGFD	5	0.123338939	1732
BIRC8	7	0.123399044	1733
HUNK	2	0.123642944	1734
REPIN1	9	0.123725177	1735
KRT72	11	0.12376239	1736
C15orf54	1	0.123788428	1737
MGC32805	2	0.123881643	1738
IQGAP3	8	0.124191714	1739
IL7R	7	0.124245951	1740
HYPK	1	0.124275337	1741
ADCK4	4	0.124448822	1742
CCDC50	7	0.124470388	1743
MTUS2	9	0.124526957	1744
PALB2	8	0.124678569	1745
CYBA	1	0.124685125	1746
RTP4	7	0.124769375	1747
C18orf56	3	0.124915261	1748
TYMS	3	0.124915261	1748
TOM1L2	1	0.124933585	1749
ZXDC	2	0.124964858	1750
SYTL2	20	0.124998174	1751
SPATA20	7	0.12502713	1752
IFNE	2	0.125127889	1753
MIR31HG	2	0.125127889	1753
CES3	4	0.125198069	1754
IGF2-AS	1	0.125364936	1755
TCF3	8	0.125577747	1756
COASY	1	0.125578424	1757
DSC3	5	0.125833066	1758
ALDH3B1	6	0.125862488	1759
ATP13A4	9	0.126035728	1760
ABCA10	8	0.126092176	1761
FSTL4	4	0.126368168	1762
HYDIN	12	0.12645195	1763
C19orf55	6	0.126542909	1764
ANGEL2	2	0.126633157	1765
RRS1	6	0.126672476	1766
GLB1	5	0.126818868	1767
TMPPE	5	0.126818868	1767
WASF2	1	0.126902603	1768
SFTPA2	6	0.126996176	1769
CD244	3	0.127203639	1770
HTR1B	3	0.127612627	1771
WRN	8	0.127840595	1772
KLKB1	4	0.128052988	1773
TAP1	7	0.128059322	1774
FARSA	6	0.128090896	1775
MKNK2	3	0.128292379	1776
SESN1	1	0.128355571	1777
LYSMD4	4	0.128366149	1778
TEP1	28	0.128516539	1779
MPV17L2	7	0.12863013	1780
PCDHGA9	36	0.128636553	1781
RNF157	5	0.128688871	1782
EXOC2	9	0.128738315	1783
ARMS2	3	0.12877708	1784
ARHGEF12	2	0.129099848	1785
TMEM163	1	0.1292776	1786
MDGA2	2	0.129515587	1787
KRT13	5	0.129568204	1788
ZNF778	31	0.129758871	1789
CMSS1	8	0.130188362	1790
TRIM49B	1	0.130232611	1791
OR11G2	5	0.130307885	1792
C1orf101	6	0.130410342	1793
AXDND1	9	0.130526326	1794
B4GALNT2	5	0.130600208	1795
HAUS3	2	0.130694754	1796
ZBP1	8	0.130744948	1797
ZNF146	1	0.130917111	1798
CD101	11	0.130962025	1799
FKBP7	1	0.131139768	1800
SRRM4	4	0.131242847	1801
TFEC	3	0.131379321	1802
TCF7L2	4	0.131417563	1803
OBP2B	1	0.131441029	1804
EXOC3L1	9	0.131530597	1805
UBXN11	6	0.131631321	1806
NRG1	6	0.131661863	1807
RAI1	8	0.131712714	1808
ANKDD1B	4	0.131762977	1809
RAB11FIP3	3	0.131889626	1810
HEXDC	3	0.131999002	1811
SLC26A1	11	0.132063245	1812
OXCT1	1	0.132098524	1813
MIER2	4	0.132200607	1814
NPAP1	10	0.13223436	1815
PCDHGB6	31	0.132289029	1816
BDNF	3	0.132306216	1817
S100A3	2	0.13238498	1818
AKAP3	9	0.132399109	1819
NOV	2	0.132809992	1820
PNPLA2	5	0.132830798	1821
RPLP2	5	0.132830798	1821
LPHN2	6	0.132914992	1822
ANXA2	3	0.132927618	1823
ERP29	1	0.133040805	1824
KIAA1984-AS1	3	0.13305421	1825
LILRA3	4	0.133173754	1826
TOP2A	5	0.133200973	1827
THEMIS	4	0.133242512	1828
SLC6A13	3	0.133362195	1829
ABCC8	6	0.133387177	1830
C11orf96	1	0.133536858	1831
APMAP	6	0.133595387	1832
CXCR1	5	0.133681942	1833
BSG	3	0.133741933	1834
NOC4L	1	0.133766112	1835
POLM	2	0.133813061	1836
BPIFB2	3	0.133930503	1837
C14orf80	9	0.133938354	1838
CCDC42B	2	0.134047573	1839
STAT2	4	0.13413983	1840
OR2T8	5	0.134157418	1841
DCAF17	5	0.134177275	1842
FRS3	4	0.134188351	1843
USP40	6	0.134208715	1844
PCDH12	9	0.134245565	1845
SERPINB7	3	0.134266184	1846
DNAJA3	4	0.134401577	1847
LTBP3	5	0.134475748	1848
TLL2	4	0.134624544	1849
TENM2	15	0.134808044	1850
FLJ22184	9	0.134925205	1851
NUP210	18	0.135091678	1852
NOX4	5	0.135468726	1853
SLC25A27	2	0.135684237	1854
ANKRD18B	7	0.135744299	1855
AMPD1	7	0.135835581	1856
SRR	3	0.135914249	1857
MTA3	10	0.135922502	1858
HMGB1	1	0.136169812	1859
MRS2	5	0.136207087	1860
SEMA4D	8	0.136254109	1861
KIAA0556	13	0.136275173	1862
AIF1	2	0.136698236	1863
GSG2	8	0.136850368	1864
NTRK1	12	0.136958737	1865
KLHDC7B	4	0.137091046	1866
TMEM176B	5	0.137292134	1867
NKAPL	7	0.137303312	1868
RPA1	4	0.137417658	1869
LONRF1	3	0.137665422	1870
CACNB2	7	0.137746035	1871
TRIM49C	4	0.13775862	1872
C9orf139	5	0.137842262	1873
PHF3	6	0.137868971	1874
TMEM237	1	0.137902915	1875
ADTRP	2	0.13821859	1876
PCGF1	1	0.138248448	1877
CFHR2	4	0.138506908	1878
CIDEB	2	0.13863401	1879
RHOT2	4	0.138918668	1880
EBLN2	4	0.139119984	1881
LOC100288524	3	0.139119984	1881
TCL1B	2	0.139119984	1881
IL36A	2	0.139120042	1882
FBXL19	2	0.139121884	1883
UBOX5	7	0.13913619	1884
UBOX5-AS1	7	0.13913619	1884
TAF4B	2	0.139161661	1885
PRDM14	2	0.139181064	1886
LLGL2	11	0.139241228	1887
GTPBP4	4	0.139401473	1888
HHIP	1	0.139730576	1889
CLDND1	1	0.139737207	1890
ZP2	2	0.139840016	1891
TUB	4	0.139978824	1892
SRRM1	4	0.140063786	1893
C15orf65	1	0.140229727	1894
CKMT1B	1	0.140398452	1895
ZSCAN21	2	0.140453879	1896
ISG20L2	1	0.140532493	1897
C11orf31	1	0.140616636	1898
NOG	1	0.140616636	1898
SPOCK3	3	0.140704111	1899
ZNF280B	5	0.140727076	1900
PRR15L	1	0.140833026	1901
PMEPA1	4	0.140856791	1902
SMYD5	1	0.140965515	1903
MCMDC2	3	0.14100863	1904
GXYLT1	1	0.141090324	1905
STX3	1	0.141191059	1906
C22orf29	4	0.141385538	1907
COA4	1	0.141392567	1908
C1orf123	1	0.141559872	1909
APOB	41	0.141588805	1910
MYEOV	7	0.14180139	1911
1-Mar	10	0.142261423	1912
CLSTN1	6	0.142358802	1913
TOPBP1	8	0.142432655	1914
DTL	3	0.142459645	1915
MCEE	3	0.142497946	1916
LIME1	2	0.142621412	1917
SYCP1	5	0.142768361	1918
LOC553103	2	0.14303514	1919
SLC22A4	2	0.14303514	1919
INADL	15	0.14327645	1920
ACVR1	1	0.14327909	1921
RSL1D1	1	0.14327909	1921
CCDC40	11	0.143344823	1922
CLDN18	3	0.143394876	1923
KRTAP19-1	1	0.143583089	1924
DNMT3L	2	0.143589587	1925
RBL1	2	0.143589587	1925
SEPN1	5	0.143746902	1926
RBAKDN	1	0.14379213	1927
RBAK-RBAKDN	1	0.14379213	1927
FANCE	4	0.143826444	1928
ABI3	5	0.143832311	1929
CTSH	4	0.143849206	1930
AP3D1	3	0.143952228	1931
ALDH1L1	10	0.144040192	1932
IFT27	1	0.144140768	1933
TCN2	8	0.144246968	1934
KRTAP5-10	3	0.144410797	1935
STX17	1	0.144542696	1936
ZNF700	4	0.144566775	1937
EPHA2	4	0.144675491	1938
HSPB2	1	0.144898899	1939
NOTCH3	12	0.145021138	1940
SLIRP	1	0.1450402	1941
GID8	1	0.145056883	1942
ANAPC10	1	0.145065973	1943
BIRC3	1	0.145065973	1943
GOT2	3	0.145096211	1944
[truncated: 12,985 more rows]
